# Supplementary material
Source: PubMed Central journal article supplement (PMC6417950)
Supplement: NIHMS999020-supplement-supp_info.pdf [file NIHMS999020-supplement-supp_info.pdf]

**Supporting Information**

**Oxygen-Dependent Regulation of SPI1 Type Three Secretion  
System by Small RNAs in *Salmonella enterica* serovar  
Typhimurium**

**Kyungsub Kim, Yekaterina A. Golubeva, Carin K. Vanderpool,  
and James M. Slauch\***

Department of Microbiology  
University of Illinois at Urbana-Champaign  
601 S. Goodwin Ave  
Urbana IL, 61801

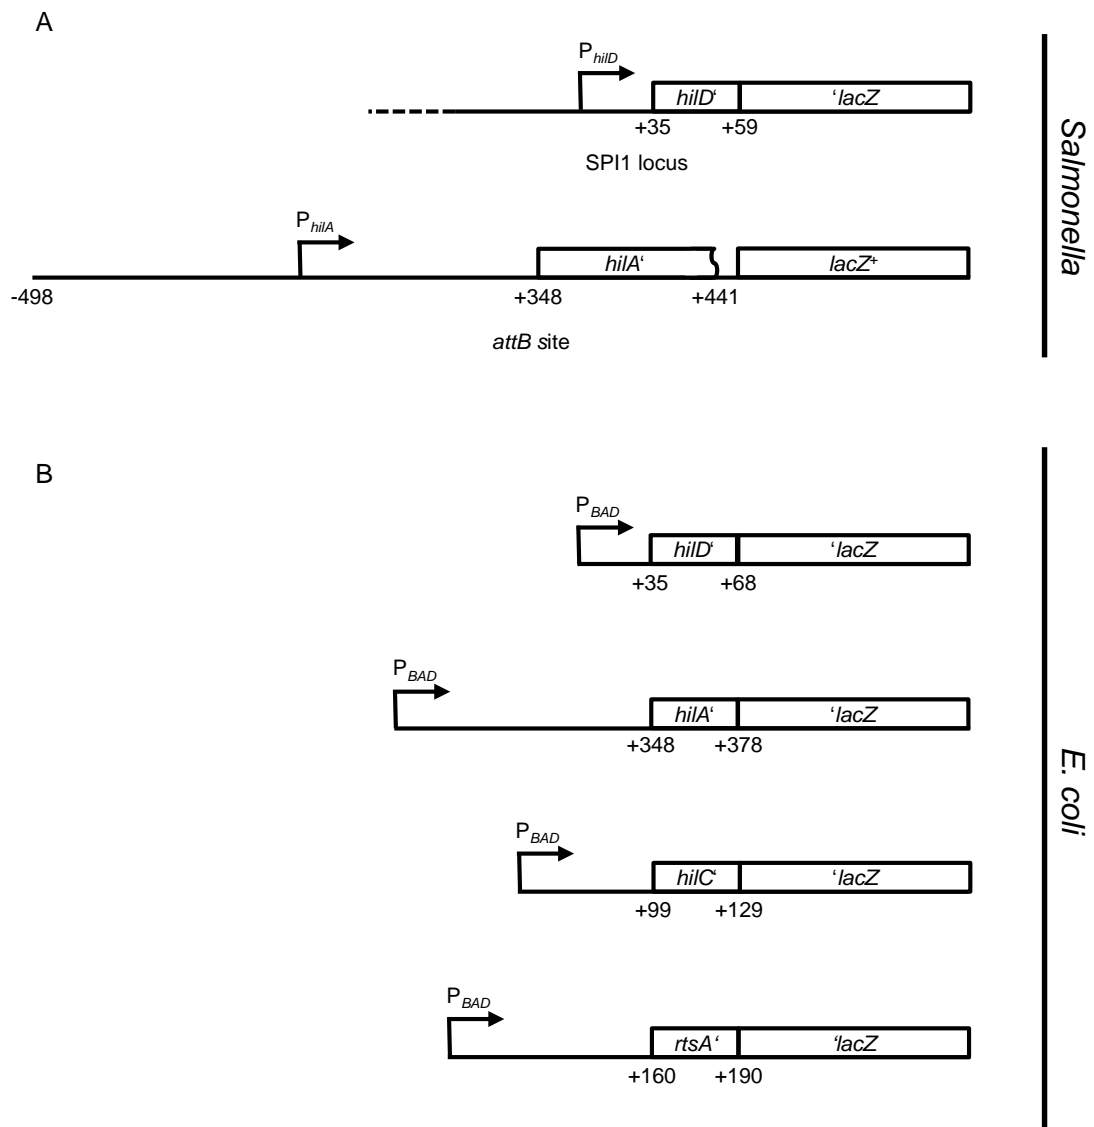

**Figure S1. Schematic representation of the *lacZ* reporter systems used in this study.** The following *lacZ* reporter fusions were used to identify sRNAs affecting SPI1 gene expression and to characterize the mechanism of regulation. (A) In *Salmonella*, an in locus *hilD'*-*lacZ* translational fusion (and, therefore, *hilD* null), or a *hilA'*-*lacZ*<sup>+</sup> transcriptional fusion integrated at the *attB* site in the chromosome both controlled by the native promoters. (B) In *E.coli*, *hilD'*-*lacZ*, *hilC'*-*lacZ*, *rtsA'*-*lacZ*, or *hilA'*-*lacZ* translational fusions were constructed in the PM1205 background. Each translational fusion contains the full 5' UTR and the partial coding region of the corresponding gene under the control of the  $P_{BAD}$  promoter.

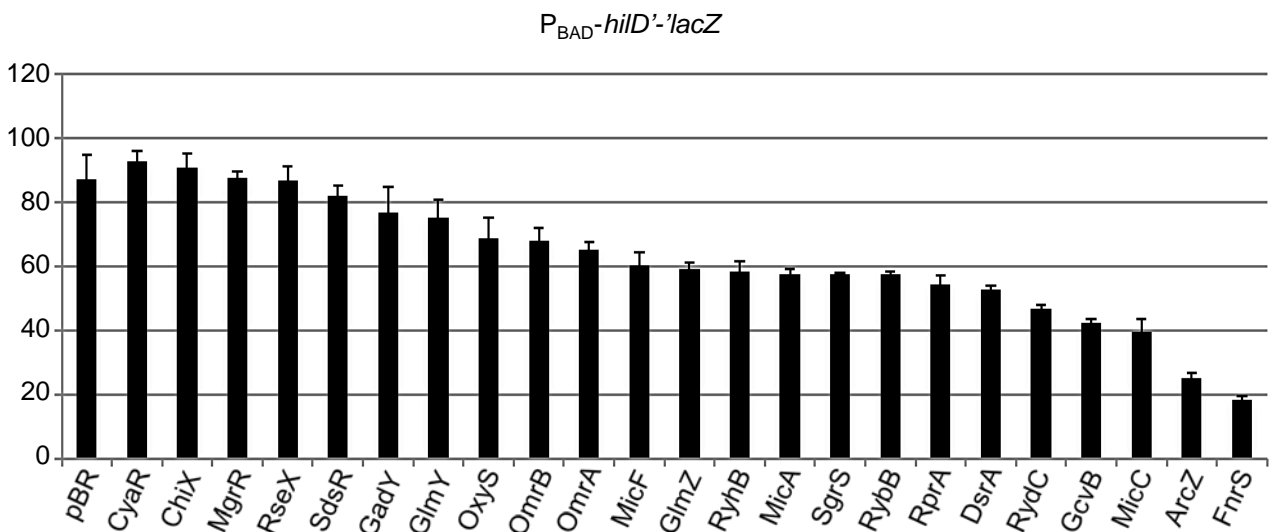

**Figure S2. Screen for sRNAs that repress *hild* translation.**

$\beta$ -galactosidase activity in *E. coli* strains containing the *hild*'-lacZ translational fusion and plasmids overexpressing the indicated *E. coli* sRNA. Strains were grown in the presence of 100  $\mu$ M IPTG and 0.001% arabinose to induce the sRNA expression and the fusion lacZ protein expression, respectively.  $\beta$ -galactosidase activity units are defined as ( $\mu$ mol of ONP formed  $\text{min}^{-1}$ )  $\times 10^6 / (\text{OD}_{600} \times \text{ml of cell suspension})$  and are reported as mean  $\pm$  standard deviation where  $n=3$ . Strains used: JMS6500 with plasmid pBRplac or this vector expressing the indicated sRNA.

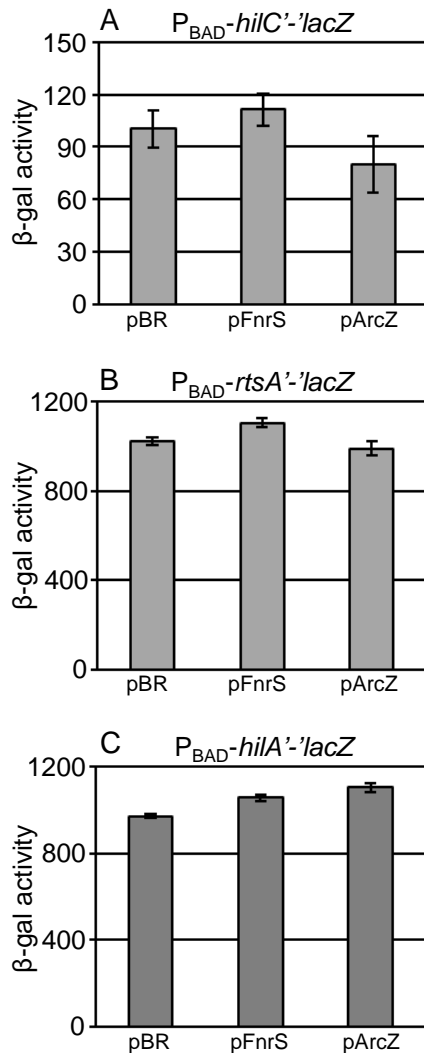

**Figure S3. FnrS and ArcZ do not regulate *hilC*, *rtsA*, or *hilA* translation in *E. coli*.**

$\beta$ -galactosidase activity in *E. coli* strains containing the (A) *hilC*'-'*lacZ*, (B) *rtsA*'-'*lacZ*, or (C) *hilA*'-'*lacZ* translational fusions and plasmids overexpressing FnrS or ArcZ grown in the presence of 100  $\mu$ M IPTG and 0.001% arabinose to induce the sRNA expression and the fusion *lacZ* protein expression, respectively.  $\beta$ -galactosidase activity units are defined as ( $\mu$ mol of ONP formed  $\text{min}^{-1}$ )  $\times 10^6 / (\text{OD}_{600} \times \text{ml of cell suspension})$  and are reported as mean  $\pm$  standard deviation where  $n=3$ . Strains used: JMS6503, JMS6504, and JMS6505, each with plasmid pBRplac, pFnrS-SM, or pArcZ-SM.

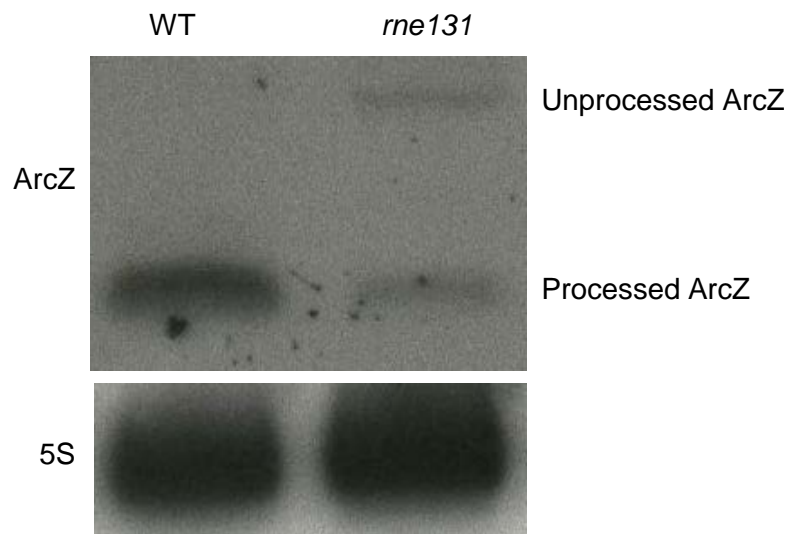

**Figure S4. Processing of ArcZ in *rne131* background.**

Total RNA was isolated from strains grown under high aeration conditions and processed as described in Experimental procedures. The RNA was probed for ArcZ sRNA and 5S RNA (loading control).

This gel is representative of two independent experiments. Strains used: 14028 and JS2117.

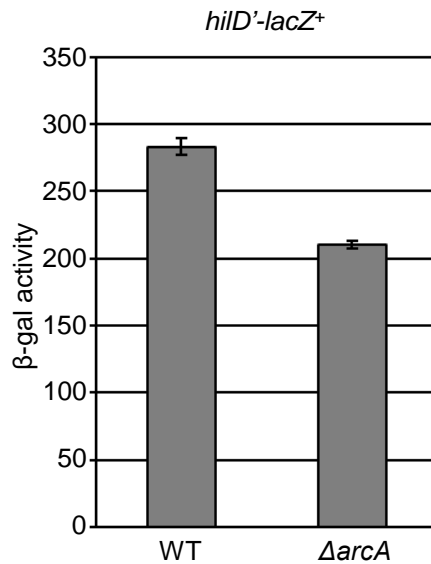

**Figure S5. ArcA activates *hilD* transcription during aerobic growth.**  $\beta$ -galactosidase activity in *Salmonella* strains containing the *hilD*<sup>-</sup>-*lacZ*<sup>+</sup> transcriptional fusion in the wild type or  $\Delta arcA$  background grown in high aeration conditions. Note that this strain is *hilD* null.  $\beta$ -galactosidase activity units are defined as ( $\mu\text{mol of ONP formed min}^{-1}$ )  $\times$   $10^6 / (\text{OD}_{600} \times \text{ml of cell suspension})$  and are reported as mean  $\pm$  standard deviation where  $n=3$ . Strains used: JS883 and JS2161.

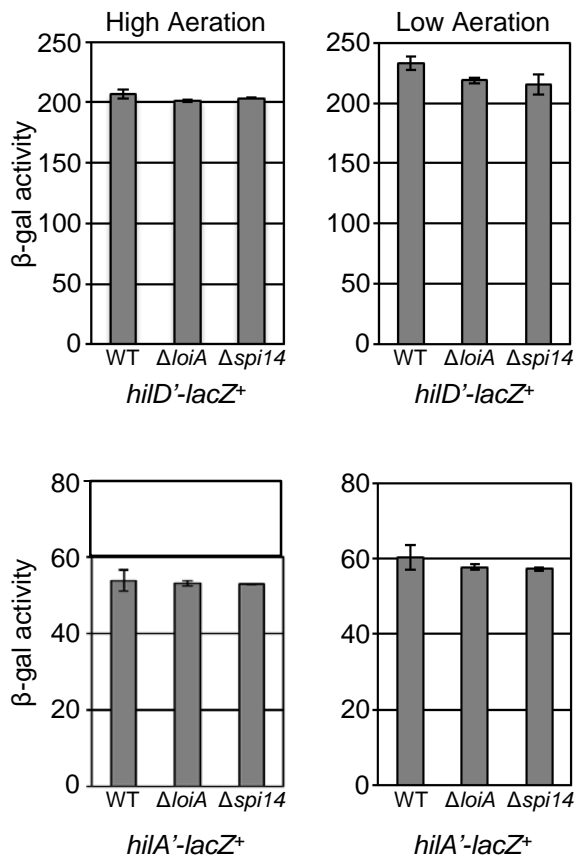

**Figure S6. Loss of *LoiA* or *SPI-14* does not affect *hild* or *hila* transcription.**  $\beta$ -galactosidase activity in *Salmonella* strains containing the  $hild'$ -lacZ<sup>+</sup> or the  $hila'$ -lacZ<sup>+</sup> transcriptional fusion in the wild type,  $\Delta loiA$ , or  $\Delta spi14$  background grown in either high oxygen or low oxygen conditions.  $\beta$ -galactosidase activity units are defined as ( $\mu\text{mol}$  of ONP formed  $\text{min}^{-1}$ )  $\times 10^6 / (\text{OD}_{600} \times \text{ml}$  of cell suspension) and are reported as mean  $\pm$  standard deviation where  $n=3$ . Strains used: JS883, JS2156, JS2157, JS749, JS2158, and JS2159.

Table S1. Bacterial strains and plasmids

| Strain            | Genotype                                                            | Deletion endpoints <sup>a</sup> | Source or reference <sup>b</sup>  |
|-------------------|---------------------------------------------------------------------|---------------------------------|-----------------------------------|
| <b>Salmonella</b> |                                                                     |                                 |                                   |
| 14028             | Wild type                                                           |                                 | ATCC <sup>c</sup>                 |
| JS481             | $\Delta(invH-avrA)2916::Cm$ (called $\Delta spi1-2916::Cm$ )        |                                 | (Ellermeier <i>et al.</i> , 2005) |
| JS570             | $\Delta hfq11::Cm$                                                  |                                 | (Ellermeier & Slauch, 2008)       |
| JS892             | $\Phi(hilD'-lacZ)hyb139$                                            |                                 | (Chubiz <i>et al.</i> , 2010)     |
| JS749             | $att\lambda::pDX1::hilA'-lacZ^+$                                    |                                 | (Lin <i>et al.</i> , 2008)        |
| JS2117            | $rne131::Cm$                                                        | 1226517 - 1227962               |                                   |
| JS2118            | $\Phi(hilD'-lacZ)hyb139 \Delta hfq11::Cm$                           |                                 |                                   |
| JS2119            | $\Phi(hilD'-lacZ)hyb139 rne131::Cm$                                 |                                 |                                   |
| JS2120            | $\Delta fnrS3::Cm$                                                  | 176026 - 1759907                |                                   |
| JS2121            | $\Delta arcZ252::Kn$                                                | 3504279 - 3504387               |                                   |
| JS2122            | $\Delta arcZ252::Cm$                                                | 3504279 - 3504387               |                                   |
| JS2123            | $\Phi(hilD'-lacZ)hyb139 \Delta fnrS3::Cm$                           |                                 |                                   |
| JS2124            | $\Phi(hilD'-lacZ)hyb139 \Delta arcZ252::Cm$                         |                                 |                                   |
| JS2125            | $att\lambda::pDX1::hilA'-lacZ^+ \Delta fnrS3::Cm$                   |                                 |                                   |
| JS2126            | $att\lambda::pDX1::hilA'-lacZ^+ \Delta arcZ252::Cm$                 |                                 |                                   |
| JS2127            | $\Delta fnr4::Kn$                                                   | 1764312 - 1765103               |                                   |
| JS1046            | $\Delta fnr1::Cm$                                                   |                                 | (Golubeva <i>et al.</i> , 2012)   |
| JS1063            | $\Delta fnr2::Tet$                                                  |                                 | (Golubeva <i>et al.</i> , 2012)   |
| JS2128            | $fnrS5::cm$                                                         | 1759979 - 1759907               |                                   |
| JS2129            | $fnrS5'-lacZ$                                                       |                                 |                                   |
| JS2130            | $fnrS5'-lacZ+ \Delta fnr2::Tet$                                     |                                 |                                   |
| JS2131            | $fnrS5'-lacZ+ \Delta fur42::Tet$                                    |                                 |                                   |
| JS583             | $att\lambda::pDX1::hilA'-lacZ^+ \Delta fur42::Tet$                  |                                 | (Ellermeier and Slauch, 2008)     |
| JS2132            | $att\lambda::pDX1::hilA'-lacZ^+ \Delta fur42::Tet \Delta fnrS3::Cm$ |                                 |                                   |



|        |                                                                                                                                                                                                                                   |                      |                               |
|--------|-----------------------------------------------------------------------------------------------------------------------------------------------------------------------------------------------------------------------------------|----------------------|-------------------------------|
| JS619  | $\Phi(\text{sodB111}'\text{-lac})\text{hyb}$                                                                                                                                                                                      |                      | (Ellermeier and Slauch, 2008) |
| JS2133 | $\Phi(\text{sodB111}'\text{-lac})\text{hyb } \Delta\text{fnrS3}::\text{Cm}$                                                                                                                                                       |                      |                               |
| JS620  | $\Phi(\text{sodB111}'\text{-lac})\text{hyb } \Delta\text{fur42}::\text{Tet}$                                                                                                                                                      |                      | (Ellermeier and Slauch, 2008) |
| JS2134 | $\Phi(\text{sodB111}'\text{-lac})\text{hyb } \Delta\text{fur42}::\text{Tet } \Delta\text{fnrS3}::\text{Cm}$                                                                                                                       |                      |                               |
| JS2135 | $\text{att}\lambda::\text{pDX1}::\text{hilA}'\text{-lacZ}^+ \Delta\text{fnr2}::\text{Tet}$                                                                                                                                        |                      |                               |
| JS2136 | $\text{att}\lambda::\text{pDX1}::\text{hilA}'\text{-lacZ}^+ \Delta\text{fnr2}::\text{Tet } \Delta\text{fnrS3}::\text{Cm}$                                                                                                         |                      |                               |
| JS2137 | $\text{att}\lambda::\text{pDX1}::\text{hilA}'\text{-lacZ}^+ \Delta\text{hilD138}::\text{FRT } \text{purA}::\text{tetRA-rtxA}$                                                                                                     |                      |                               |
| JS2138 | $\text{att}\lambda::\text{pDX1}::\text{hilA}'\text{-lacZ}^+ \Delta\text{hilD138}::\text{FRT } \text{purA}::\text{tetRA-rtxA } \Delta\text{fnrS3}::\text{Cm}$                                                                      |                      |                               |
| JS2139 | $\text{att}\lambda::\text{pDX1}::\text{hilA}'\text{-lacZ}^+ \Delta\text{hilD138}::\text{FRT } \text{purA}::\text{tetRA-rtxA } \Delta\text{fnr4}::\text{Kn}$                                                                       |                      |                               |
| JS2140 | $\text{att}\lambda::\text{pDX1}::\text{hilA}'\text{-lacZ}^+ \Delta\text{hilD138}::\text{FRT } \text{purA}::\text{tetRA-rtxA } \Delta\text{fnr4}::\text{Kn } \Delta\text{fnrS3}::\text{Cm}$                                        |                      |                               |
| JS2141 | $\Delta\text{arcA253}::\text{cm}$                                                                                                                                                                                                 | 4868202 -<br>4868920 |                               |
| JS2142 | $\Delta\text{arcA254}::\text{Tet}$                                                                                                                                                                                                | 4868242 -<br>4868863 |                               |
| JS2077 | $\text{att}\lambda::\text{pDX1}::\text{hilA}'\text{-lacZ}^+ \Delta\text{spi1-2916}::\text{FRT } \Delta\text{rtsA5}::\text{FRT } \text{purA}::\text{tetRA-rtxA}$                                                                   |                      | (Golubeva et al., 2016)       |
| JS2143 | $\Phi(\text{hilD}'\text{-lacZ})\text{hyb139 } \Delta\text{arcA253}::\text{Cm}$                                                                                                                                                    |                      |                               |
| JS2144 | $\Phi(\text{hilD}'\text{-lacZ})\text{hyb139 } \Delta\text{arcA253}::\text{Cm } \Delta\text{arcZ252}::\text{Kn}$                                                                                                                   |                      |                               |
| JS2145 | $\text{att}\lambda::\text{pDX1}::\text{hilA}'\text{-lacZ}^+ \Delta\text{arcA253}::\text{Cm}$                                                                                                                                      |                      |                               |
| JS2146 | $\text{att}\lambda::\text{pDX1}::\text{hilA}'\text{-lacZ}^+ \Delta\text{arcA253}::\text{Cm } \Delta\text{arcZ252}::\text{Kn}$                                                                                                     |                      |                               |
| JS2147 | $\text{att}\lambda::\text{pDX1}::\text{hilA}'\text{-lacZ}^+ \Delta\text{hilD138}::\text{FRT}$                                                                                                                                     |                      |                               |
| JS2148 | $\text{att}\lambda::\text{pDX1}::\text{hilA}'\text{-lacZ}^+ \Delta\text{hilD138}::\text{FRT } \Delta\text{arcZ252}::\text{Kn}$                                                                                                    |                      |                               |
| JS2149 | $\text{att}\lambda::\text{pDX1}::\text{hilA}'\text{-lacZ}^+ \Delta\text{hilD138}::\text{FRT } \Delta\text{arcA253}::\text{Cm}$                                                                                                    |                      |                               |
| JS2150 | $\text{att}\lambda::\text{pDX1}::\text{hilA}'\text{-lacZ}^+ \Delta\text{hilD138}::\text{FRT } \Delta\text{arcZ252}::\text{Kn } \Delta\text{arcA253}::\text{Cm}$                                                                   |                      |                               |
| JS2151 | $\text{att}\lambda::\text{pDX1}::\text{hilA}'\text{-lacZ}^+ \Delta\text{spi1-2916}::\text{FRT } \Delta\text{rtsA5}::\text{FRT } \text{purA}::\text{tetRA-rtxA } \Delta\text{arcA253}::\text{Cm}$                                  |                      |                               |
| JS2152 | $\text{att}\lambda::\text{pDX1}::\text{hilA}'\text{-lacZ}^+ \Delta\text{spi1-2916}::\text{FRT } \Delta\text{rtsA5}::\text{FRT } \text{purA}::\text{tetRA-rtxA } \Delta\text{arcZ252}::\text{Kn}$                                  |                      |                               |
| JS2153 | $\text{att}\lambda::\text{pDX1}::\text{hilA}'\text{-lacZ}^+ \Delta\text{spi1-2916}::\text{FRT } \Delta\text{rtsA5}::\text{FRT } \text{purA}::\text{tetRA-rtxA } \Delta\text{arcA253}::\text{Cm } \Delta\text{arcZ252}::\text{Kn}$ |                      |                               |
| JS883  | $\Phi(\text{hilD}'\text{-lac}^+) 139$                                                                                                                                                                                             |                      | (Chubiz et al., 2010)         |
| JS2154 | $\Delta\text{loiA}::\text{Cm}$                                                                                                                                                                                                    | 933078 -<br>934003   |                               |
| JS2155 | $\Delta\text{spi14}::\text{Cm}$                                                                                                                                                                                                   | 927271 -<br>934003   |                               |

|                       |                                                                                                                        |                     |                                 |
|-----------------------|------------------------------------------------------------------------------------------------------------------------|---------------------|---------------------------------|
| JS2156                | $\Phi(hilD'-lac^+)$ 139 $\Delta loiA::Cm$                                                                              |                     |                                 |
| JS2157                | $\Phi(hilD'-lac^+)$ 139 $\Delta spi14::Cm$                                                                             |                     |                                 |
| JS2158                | $att\lambda::pDX1::hilA'-lacZ^+$ $\Delta loiA::Cm$                                                                     |                     |                                 |
| JS2159                | $att\lambda::pDX1::hilA'-lacZ^+$ $\Delta spi14::Cm$                                                                    |                     |                                 |
| JS2160                | $att\lambda::pDX1::hilA'-lacZ^+$ $\Delta fnrS3::Cm$ $\Delta arcZ252::Kn$                                               |                     |                                 |
| JS2161                | $\Phi(hilD'-lac^+)$ 139 $\Delta arcA254::Tet$                                                                          |                     |                                 |
| JS2075                | $att\lambda::pDX1::hilA'-lacZ^+$ $\Delta spi1-2916::FRT$ $\Delta rtsA::FRT$                                            |                     | (Golubeva <i>et al.</i> , 2016) |
| JS2162                | $att\lambda::pDX1::hilA'-lacZ^+$ $\Delta spi1-2916::FRT$ $\Delta rtsA::FRT$<br>$\Delta fnrS3::Cm$ $\Delta arcZ252::Kn$ |                     |                                 |
| JS107                 | $zjg8101::Kn$                                                                                                          |                     | (Mann and Slauch, 1997)         |
| JS2163                | $att\lambda::pDX1::hilA'-lacZ^+$ $zjg8101::Kn$                                                                         |                     |                                 |
| JS2164                | $att\lambda::pDX1::hilA'-lacZ^+$ $\Delta arcZ252::Kn$                                                                  |                     |                                 |
| JS2165                | $\Delta fnrS3::Kn$                                                                                                     | 176026 -<br>1759907 |                                 |
| JS2166                | $rne131::Cm$ $\Delta fnrS3::Kn$                                                                                        |                     |                                 |
| JS2167                | $rne131::Cm$ $\Delta arcZ252::Kn$                                                                                      |                     |                                 |
|                       |                                                                                                                        |                     |                                 |
| <b><i>E. coli</i></b> |                                                                                                                        |                     |                                 |
| PM1205                | MG1655 $mal::lacI^q$ , $\Delta araBAD$ $araC^+$ , $lacI'::P_{BAD-cat-sacB:lacZ}$ , $mini\lambda tet^R$                 |                     | (Mandin and Gottesman, 2009)    |
| JMS6500               | PM1205 $lacI'::P_{BAD-hilD}'-lacZ$                                                                                     |                     |                                 |
| JMS6501               | PM1205 $lacI'::P_{BAD-hilDmt1}'-lacZ$                                                                                  |                     |                                 |
| JMS6502               | PM1205 $lacI'::P_{BAD-hilDmt2}'-lacZ$                                                                                  |                     |                                 |
| JMS6503               | PM1205 $lacI'::P_{BAD-hilC}'-lacZ$                                                                                     |                     |                                 |
| JMS6504               | PM1205 $lacI'::P_{BAD-rtsA}'-lacZ$                                                                                     |                     |                                 |
| JMS6505               | PM1205 $lacI'::P_{BAD-hilA}'-lacZ$                                                                                     |                     |                                 |
| <b>Plasmids</b>       |                                                                                                                        |                     |                                 |
| pBRplac               | Amp <sup>R</sup> , <i>p</i> lac promoter based expression vector                                                       |                     | (Guillier and Gottesman, 2006)  |

|          |                                                                                       |  |                              |
|----------|---------------------------------------------------------------------------------------|--|------------------------------|
| pFnrS-EC | AatII-EcoRI <i>fnrS</i> ( <i>E.coli</i> ) containing fragment cloned into pBRplac     |  | (Mandin and Gottesman, 2009) |
| pFnrS-SM | AatII-EcoRI <i>fnrS</i> ( <i>Salmonella</i> ) containing fragment cloned into pBRplac |  |                              |
| pFnrS-mt | C47G site directed mutation in pFnrS-SM                                               |  |                              |
| pArcZ-EC | AatII-EcoRI <i>arcZ</i> ( <i>E.coli</i> ) containing fragment cloned into pBRplac     |  | (Mandin and Gottesman, 2009) |
| pArcZ-SM | AatII-EcoRI <i>arcZ</i> ( <i>Salmonella</i> ) containing fragment cloned into pBRplac |  |                              |
| pArcZ-mt | C66G, C67G, G70C, G71T, T72A, G73C, T74A site directed mutations in pArcZ-SM          |  |                              |

a Numbers indicate the base pairs that are deleted (inclusive) as defined in the *S. enterica* serovar Typhimurium 14028 genome sequence (National Center for Biotechnology Information; CP001363.1).

b This study unless specified otherwise.

c ATCC, American Type Culture Collection.

Table S2. Primers used

| Brief description    | Primer Sequence                                                  |
|----------------------|------------------------------------------------------------------|
| F-AatII-ArcZ         | GACTGACGTCGTGCGGCCTGAAAACAGGACTGCGC                              |
| R-EcoRI-ArcZ         | GACTGAATTCCTGGGTGGCAAACGCGGAAAA                                  |
| F-AatII-FnrS         | GACTGACGTCGCAGGTGAATGCAACGTCAAGCGAT                              |
| R-EcoRI-FnrS         | GACTGAATTCGACGCAGATAGTCTACAGGCAAAA                               |
| F-mt-ArcZ            | TAAGCACGGCGCAGCCACGATTTGGCTCTACATGGCGCAGT<br>ATTCGCGCACCCCGG     |
| R-mt-ArcZ            | CCGGGGTGCGCGAATACTGCGCCATGTAGAGCCAAATCGTG<br>GCTGCGCCGTGCTTA     |
| F-mt-FnrS            | CGATGGGCGTTGCGCTCCATATTGACTTACTTCTTTTTTGA<br>TTACT               |
| R-mt-FnrS            | AGTAATTCAAAAAGGAAGTAAGTCAATATGGAGCGCAACGC<br>CCATCG              |
| F-C-rne131-KO        | CTGGCGGTCGGCTTTGTATCAGCATTACATGTAGGCTGGAG<br>CTG                 |
| R-C-rne131-KO        | ACCGTCGAAACAGCCGCGCCGAAAGCGGAATAACATATGAA<br>TATCCTC             |
| F-hilD'-lacZ E. coli | ACCTGACGCTTTTTATCGCAACTCTCTACTGTTTCTCCATAAG<br>GAACATTAATAACAT   |
| R-hilD'-lacZ E. coli | TAACGCCAGGGTTTTCCAGTCACGACGTTGTAAAACGACAT<br>GACTATTACTTACAAAGG  |
| F-hilD'-lacZ mt1     | TTTATCGCAACTCTCTACTGTTTCTCCATAAGGAACATTA<br>TAACATCAACAAAGGGT    |
| F-hilD'-lacZ mt2     | TTTTATCGCAACTCTCTACTGTTTCTCCATAAGGAACATTA<br>ATATGTGGAACAAAGCC   |
| F-hilA'-lacZ E. coli | ACGCTTTTTATCGCAACTCTCTACTGTTTCTCCATAAACTAA<br>TCTCTATTGCAATGAGG  |
| R-hilA'-lacZ E. coli | TAACGCCAGGGTTTTCCAGTCACGACGTTGTAAAACGACCG<br>ATACAGGAACAGGATTA   |
| F-rtsA'-lacZ E. coli | TTTTATCGCAACTCTCTACTGTTTCTCCATAGAAATGCAATAT<br>AAAATAGCATTTTCCAT |
| R-rtsA'-lacZ E. coli | GTTTTCCAGTCACGACGTTGTAAAACGACCTGGACAGGTGA<br>GGGATTAATACTTTTAG   |
| F-hilC'-lacZ E. coli | CTTTTATCGCAACTCTCTACTGTTTCTCCATGAGTTCCTTAT<br>AGCACACAGGATAAAAT  |
| F-hilC'-lacZ E. coli | AGGGTTTTCCAGTCACGACGTTGTAAAACGACCTCAACTGA<br>TTTATTCATTGAAGGCAA  |
| F-KO-Fnr             | TCCTTCTCCGGGATAGCTCAGACTTACGCGCTCACCAAAAAG<br>ATGTGTAGGCTGGAGCTG |
| R-KO-Fnr             | ATTTAACGATATGGCAGAAGATAACATCAATGGTTTAGCTGA<br>CGTCATATGAATATCCTC |
| F-KO-FnrS            | AGTCAATAAACCATCTACCTATTGGGGCAATATCTCTCTCG<br>CAGTGTAGGCTGGAGCTG  |
| R-KO-FnrS            | ATGTCATTGACTCTTAAAGGGTAGACGCAGATAGTCTACA<br>GGCCATATGAATATCCTC   |
| F-KO-FnrS20          | TGAATGCAACGTCAAGCGATGGGCGTTGCGCTCCATATTGTC<br>TTATGTAGGCTGGAGCTG |

|              |                                                                  |
|--------------|------------------------------------------------------------------|
| F-KO-ArcZ109 | ATTCATGTAACAAATCATTTAGGATTTGCTATCTTAACTGCGT<br>GCTGTAGGCTGGAGCTG |
| R-KO-ArcZ109 | GTCGCGGTGCTGAAAGCCTGGGTGGCAAACGCGGAAAAAAA<br>ATGACATATGAATATCCTC |
| F-ArcA-KO    | ACCGGCTGTTTTTACAGTTTGGCGCCTGGGCCGAATGTAGG<br>CTGGAGCTG           |
| R-ArcA-KO    | CTGTTTCGATTTAGTTGGCAATTTAGGTAGCAAACCATATGAA<br>TATCCTC           |
| F-KO-LoiA    | ATGCAAACGTTAGAACGGTTTTTTCTTTTCGTTACGGGGTGTA<br>GGCTGGAGCTG       |
| F-KO-spi14   | AACGGACCAAATTATACAGGGATGTAACGCTATCACTCAGTC<br>TGTGTAGGCTGGAGCTG  |
| R-KO-LoiA    | AAAGCAGCACACTGTATTATACGTTAATTATGAGCCACAACG<br>ATGCATATGAATATCCTC |
| AO-ArcZ      | GAATACTGCGCCAACACCAG                                             |
| AO-RrfA      | CTACGGCGTTTCACTTCTGAGTTC                                         |
| hilD-CDS-F   | ATGGAAAATGTAACCTTTGTAAGTAATAGTCATCAG                             |
| hilD-CDS-R   | TTAATGGTTCGCCATTTTTATGAATGTCGATGGCGT                             |

Table S3. In vivo competitions between *hilA-lac* pDX1 and wild type *S. Typhimurium*.

| Route of infection | Tissue          | Geometric Mean CI | Number of Mice | P  |
|--------------------|-----------------|-------------------|----------------|----|
| IP                 | Spleen          | 0.91              | 6              | NS |
| Oral               | Small Intestine | 0.86              | 5              | NS |
|                    | Spleen          | 0.60              | 5              | NS |

Strains used: JS107, JS2163

Table S4. In vitro competition assays

| Strain A                                                    | Strain B                  | No. of replicates | CI   | P      |
|-------------------------------------------------------------|---------------------------|-------------------|------|--------|
| <b>13 mm tubes: 2 mL HSLB, roller drum, 16 h, 37°C</b>      |                           |                   |      |        |
| <i>hilA-lac</i> pDX1                                        | wt                        | 6                 | 0.93 | NS     |
| <i>fnrS arcZ hilA-lac</i> pDX1                              | <i>hilA-lac</i> pDX1      | 6                 | 1.35 | 0.0024 |
| <i>fnrS arcZ spi1 hilA-lac</i> pDX1                         | <i>spi1 hilA-lac</i> pDX1 | 6                 | 1.27 | 0.009  |
| <b>125 mL flasks: 4 mL HSLB, shaker 200 rpm, 16 h, 37°C</b> |                           |                   |      |        |
| <i>hilA-lac</i> pDX1                                        | wt                        | 6                 | 0.95 | NS     |
| <i>fnrS arcZ hilA-lac</i> pDX1                              | <i>hilA-lac</i> pDX1      | 6                 | 1.17 | 0.005  |
| <i>fnrS arcZ spi1 hilA-lac</i> pDX1                         | <i>spi1 hilA-lac</i> pDX1 | 6                 | 1.03 | NS     |

Strains were grown the same as described in Experimental procedures for a mice competition assays, then mixed 1:1, diluted and inoculated into indicated medium/condition at  $10^3$  bacteria per tube/flask, then grown for 16h in indicated conditions. Strains used: JS107, JS2163, JS749, JS2075, JS2162, and JS2160.

## References

- Chubiz, J.E., Golubeva, Y.A., Lin, D., Miller, L.D. and Slauch, J.M. (2010) FliZ regulates expression of the *Salmonella* pathogenicity island 1 invasion locus by controlling HilD protein activity in *Salmonella enterica* serovar Typhimurium. *J Bacteriol* **192**: 6261-6270.
- Ellermeier, C.D., Ellermeier, J.R. and Slauch, J.M. (2005) HilD, HilC and RtsA constitute a feed forward loop that controls expression of the SPI1 type three secretion system regulator *hilA* in *Salmonella enterica* serovar Typhimurium. *Mol Microbiol* **57**: 691-705.
- Ellermeier, J.R. and Slauch, J.M. (2008) Fur regulates expression of the *Salmonella* pathogenicity island 1 type III secretion system through HilD. *J Bacteriol* **190**: 476-486.
- Golubeva, Y.A., Ellermeier, J.R., Cott Chubiz, J.E. and Slauch, J.M. (2016) Intestinal long-chain fatty acids act as a direct signal to modulate expression of the *Salmonella* pathogenicity island 1 type iii secretion system. *mBio* **7**: e02170-02115.
- Guillier, M. and Gottesman, S. (2006) Remodelling of the *Escherichia coli* outer membrane by two small regulatory RNAs. *Mol Microbiol* **59**: 231-247.
- Mandin, P. and Gottesman, S. (2009) A genetic approach for finding small RNAs regulators of genes of interest identifies RybC as regulating the DpiA/DpiB two-component system. *Mol Microbiol* **72**: 551-565.
- Mann, B.A. and Slauch, J.M. (1997) Transduction of low-copy number plasmids by bacteriophage P22. *Genetics* **146**: 447-456.
